# Supplementary material
Source: MDPI journal article supplement (https://www.mdpi.com/2411-5150/7/3/48)
Supplement: s1 [file s1]

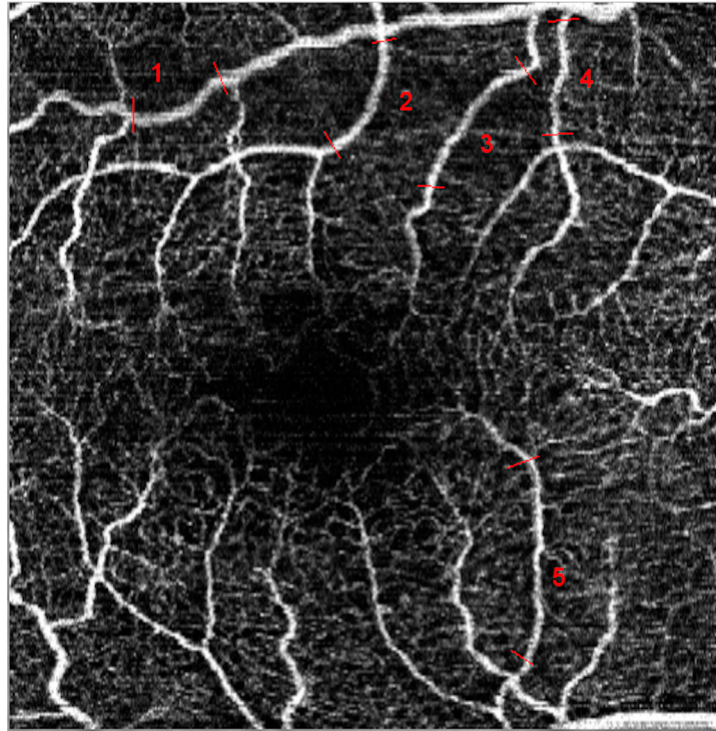

**Figure S1.** - Example of Good Quality Image.

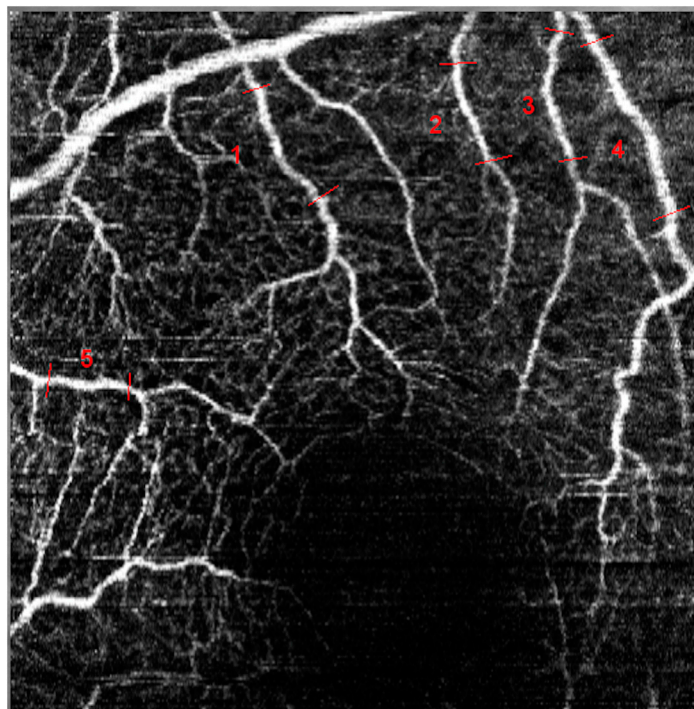

**Figure S2.** - Example of Fair Quality Image.

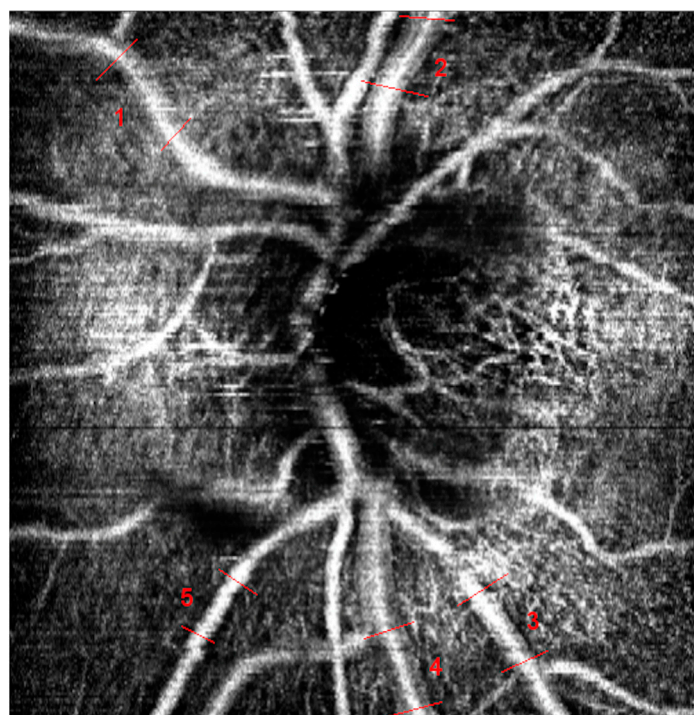

**Figure S3.** - Example of Poor Quality Image.

**Table S1.** Mean, SD, ICC, and CoV of Vessel Width Measures of Two Sequential Images of the Same Vessel in the Macula by the Same Grader.

|                      | Mean Vessel Width<br>for each subgroup<br>( $\mu\text{m}$ ) | Standard<br>Deviation of<br>two images <sup>1</sup><br>( $\mu\text{m}$ ) | CoV of Vessel<br>Width | ICC <sup>^</sup><br>(95%<br>Confidence<br>Interval) | MDC   |
|----------------------|-------------------------------------------------------------|--------------------------------------------------------------------------|------------------------|-----------------------------------------------------|-------|
| All Subjects (n=310) | 34.49                                                       | 5.03                                                                     | 0.15                   | 0.72 (0.67, 0.76)                                   | 13.95 |
| Age*                 |                                                             |                                                                          |                        |                                                     |       |
| <55 (n=115)          | 36.40                                                       | 6.65                                                                     | 0.18                   | 0.62 (0.57, 0.67)                                   | 18.43 |
| 55+ (n=195)          | 33.37                                                       | 3.77                                                                     | 0.11                   | 0.80 (0.77, 0.83)                                   | 10.44 |
| Race*                |                                                             |                                                                          |                        |                                                     |       |
| White (n=80)         | 34.22                                                       | 2.48                                                                     | 0.07                   | 0.87 (0.85, 0.89)                                   | 15.17 |
| Asian (n=20)         | 42.06                                                       | 5.47                                                                     | 0.13                   | 0.84 (0.81, 0.86)                                   | 15.72 |
| Black (n=210)        | 33.88                                                       | 5.67                                                                     | 0.17                   | 0.64 (0.60, 0.69)                                   | 6.89  |
| Sex                  |                                                             |                                                                          |                        |                                                     |       |
| Female (n=185)       | 24.03                                                       | 3.62                                                                     | 0.11                   | 0.81 (0.78, 0.84)                                   | 10.03 |
| Male (n=125)         | 35.17                                                       | 6.59                                                                     | 0.19                   | 0.63 (0.58, 0.68)                                   | 18.26 |
| Glaucoma*            |                                                             |                                                                          |                        |                                                     |       |
| None (n=165)         | 34.06                                                       | 5.78                                                                     | 0.17                   | 0.67 (0.62, 0.71)                                   | 16.02 |
| Suspect (n=60)       | 36.22                                                       | 2.97                                                                     | 0.08                   | 0.81 (0.78, 0.84)                                   | 8.24  |
| Mild/mod (n=45)      | 31.85                                                       | 2.80                                                                     | 0.09                   | 0.89 (0.88, 0.91)                                   | 7.76  |
| Advanced (n=40)      | 36.64                                                       | 6.04                                                                     | 0.16                   | 0.68 (0.64, 0.73)                                   | 16.74 |
| Diabetes             |                                                             |                                                                          |                        |                                                     |       |
| 0 (n=190)            | 33.80                                                       | 5.23                                                                     | 0.15                   | 0.63 (0.58, 0.68)                                   | 14.48 |
| 1 (n=120)            | 35.59                                                       | 4.71                                                                     | 0.13                   | 0.80 (0.77, 0.83)                                   | 13.06 |
| Hypertension         |                                                             |                                                                          |                        |                                                     |       |
| 0 (n=120)            | 34.75                                                       | 6.28                                                                     | 0.18                   | 0.57 (0.51, 0.63)                                   | 17.41 |
| 1 (n=190)            | 34.44                                                       | 4.05                                                                     | 0.12                   | 0.81 (0.78, 0.84)                                   | 11.23 |
| Pseudophakia         |                                                             |                                                                          |                        |                                                     |       |
| 0 (n=265)            | 24.62                                                       | 5.11                                                                     | 0.15                   | 0.72 (0.68, 0.76)                                   | 14.16 |

|                            |       |       |      |                   |       |
|----------------------------|-------|-------|------|-------------------|-------|
| 1 (n=45)                   | 33.74 | 4.57  | 0.14 | 0.63 (0.58, 0.69) | 12.66 |
| Vessel Width*              |       |       |      |                   |       |
| Low (<33.4) (n=166)        | 28.32 | 3.25  | 0.11 | #                 | 9.01  |
| Medium (33.4=52.7) (n=132) | 39.88 | 3.91  | 0.10 |                   | 10.85 |
| High (52.7+)(n=12)         | 60.58 | 18.43 | 0.30 |                   | 51.09 |
| Length *                   |       |       |      |                   |       |
| Less than median (n=155)   | 32.67 | 3.91  | 0.12 | 0.78 (0.75, 0.82) | 10.84 |
| More than median(n=155)    | 36.31 | 5.95  | 0.16 | 0.65 (0.60, 0.70) | 16.49 |

\*Statistically significant difference in mean vessel width to the level of  $P < 0.05$ . ^ICC confidence intervals calculated using the method of Zou [37]. #ICC for vessel width categories not provided because stratifying by vessel width artificially reduces the between-vessel variance on which the ICC depends. SD of two images refers to the SD of measurements of two images on the same vessel by the same grader.; ICC-interclass correlation coefficient; CoV-coefficient of variation; MDC- Minimal Detectible Change.

**Table 2.** Mean, SD, ICC, and CoV of Vessel Width Measures of Two Sequential Images of the Same Vessel at the Optic Nerve Head by the Same Grader.

|                           | Mean Vessel Width<br>for each subgroup<br>( $\mu\text{m}$ ) | Standard<br>Deviation of<br>two images <sup>1</sup><br>( $\mu\text{m}$ ) | CoV of Vessel<br>Width | ICC <sup>^</sup><br>(95%<br>Confidence<br>Interval) | MDC   |
|---------------------------|-------------------------------------------------------------|--------------------------------------------------------------------------|------------------------|-----------------------------------------------------|-------|
| All Subjects (n=240)      | 80.29                                                       | 5.58                                                                     | 0.07                   | 0.98 (0.98, 0.98)                                   | 15.47 |
| Age                       |                                                             |                                                                          |                        |                                                     |       |
| <55 (n=100)               | 85.83                                                       | 5.18                                                                     | 0.06                   | 0.98 (0.98, 0.98)                                   | 14.36 |
| 55+ (n=140)               | 76.33                                                       | 5.84                                                                     | 0.08                   | 0.98 (0.98, 0.98)                                   | 16.21 |
| Race*                     |                                                             |                                                                          |                        |                                                     |       |
| White (n=75)              | 87.56                                                       | 4.08                                                                     | 0.05                   | 0.99 (0.98, 0.99)                                   | 21.07 |
| Asian (n=20)              | 68.56                                                       | 7.60                                                                     | 0.11                   | 0.91 (0.90, 0.92)                                   | 16.38 |
| Black (n=145)             | 78.15                                                       | 5.91                                                                     | 0.08                   | 0.98 (0.98, 0.98)                                   | 11.31 |
| Sex                       |                                                             |                                                                          |                        |                                                     |       |
| Female (n=150)            | 82.53                                                       | 5.46                                                                     | 0.07                   | 0.98 (0.98, 0.98)                                   | 15.14 |
| Male (n=90)               | 76.56                                                       | 5.77                                                                     | 0.08                   | 0.98 (0.97, 0.98)                                   | 16.00 |
| Glaucoma*                 |                                                             |                                                                          |                        |                                                     |       |
| None (n=130)              | 79.62                                                       | 5.44                                                                     | 0.07                   | 0.98 (0.98, 0.98)                                   | 15.08 |
| Suspect (n=55)            | 89.65                                                       | 5.46                                                                     | 0.06                   | 0.97 (0.96, 0.97)                                   | 15.14 |
| Mild/mod (n=40)           | 72.89                                                       | 6.51                                                                     | 0.09                   | 0.98 (0.97, 0.98)                                   | 18.06 |
| Advanced (n=15)           | 71.52                                                       | 4.34                                                                     | 0.06                   | 0.99 (0.99, 0.99)                                   | 12.02 |
| Diabetes*                 |                                                             |                                                                          |                        |                                                     |       |
| 0 (n=150)                 | 87.39                                                       | 4.52                                                                     | 0.05                   | 0.99 (0.98, 0.99)                                   | 12.53 |
| 1 (n=90)                  | 68.46                                                       | 7.00                                                                     | 0.10                   | 0.96 (0.96, 0.97)                                   | 19.40 |
| Hypertension*             |                                                             |                                                                          |                        |                                                     |       |
| 0 (n=85)                  | 90.04                                                       | 4.39                                                                     | 0.05                   | 0.99 (0.98, 0.99)                                   | 12.18 |
| 1 (n=155)                 | 74.94                                                       | 6.13                                                                     | 0.08                   | 0.98 (0.97, 0.98)                                   | 17.00 |
| Pseudophakia              |                                                             |                                                                          |                        |                                                     |       |
| 0 (n=215)                 | 80.15                                                       | 5.54                                                                     | 0.07                   | 0.98 (0.98, 0.98)                                   | 15.36 |
| 1 (n=25)                  | 81.51                                                       | 5.90                                                                     | 0.07                   | 0.98 (0.97, 0.98)                                   | 16.34 |
| Vessel Width*             |                                                             |                                                                          |                        |                                                     |       |
| Low (<33.4) (n=17)        | 28.05                                                       | 2.41                                                                     | 0.09                   |                                                     | 6.69  |
| Medium (33.4–52.7) (n=52) | 43.75                                                       | 4.89                                                                     | 0.11                   | #                                                   | 13.57 |
| High (52.7+) (n=171)      | 96.59                                                       | 5.99                                                                     | 0.06                   |                                                     | 16.59 |
| Length *                  |                                                             |                                                                          |                        |                                                     |       |
| Less than median (n=126)  | 83.00                                                       | 5.86                                                                     | 0.07                   | 0.98 (0.97, 0.98)                                   | 16.23 |
| More than median(n=114)   | 77.29                                                       | 5.26                                                                     | 0.07                   | 0.98 (0.98, 0.98)                                   | 14.57 |

\*Statistically significant difference in mean vessel width to the level of  $P < 0.05$ . <sup>^</sup>ICC confidence intervals calculated using the method of Zou [37]. #ICC for vessel width categories not provided because stratifying by vessel width artificially reduces the between-vessel variance on which the ICC depends. SD of two images refers to the SD of measurements of two images on the same vessel by the same grader.; ICC-interclass correlation coefficient; CoV-coefficient of variation; MDC- Minimal Detectable Change.
